# Supplementary material
Source: Springer Nature journal article supplement (https://www.springermedizin.de/resource/supplementary/12885_2011_2921_MOESM1_ESM.pdf/9462294)
Supplement: MOESM1 [file 9462294]

**Primary treatment phase**

**Maintenance treatment phase**

**Follow-up**

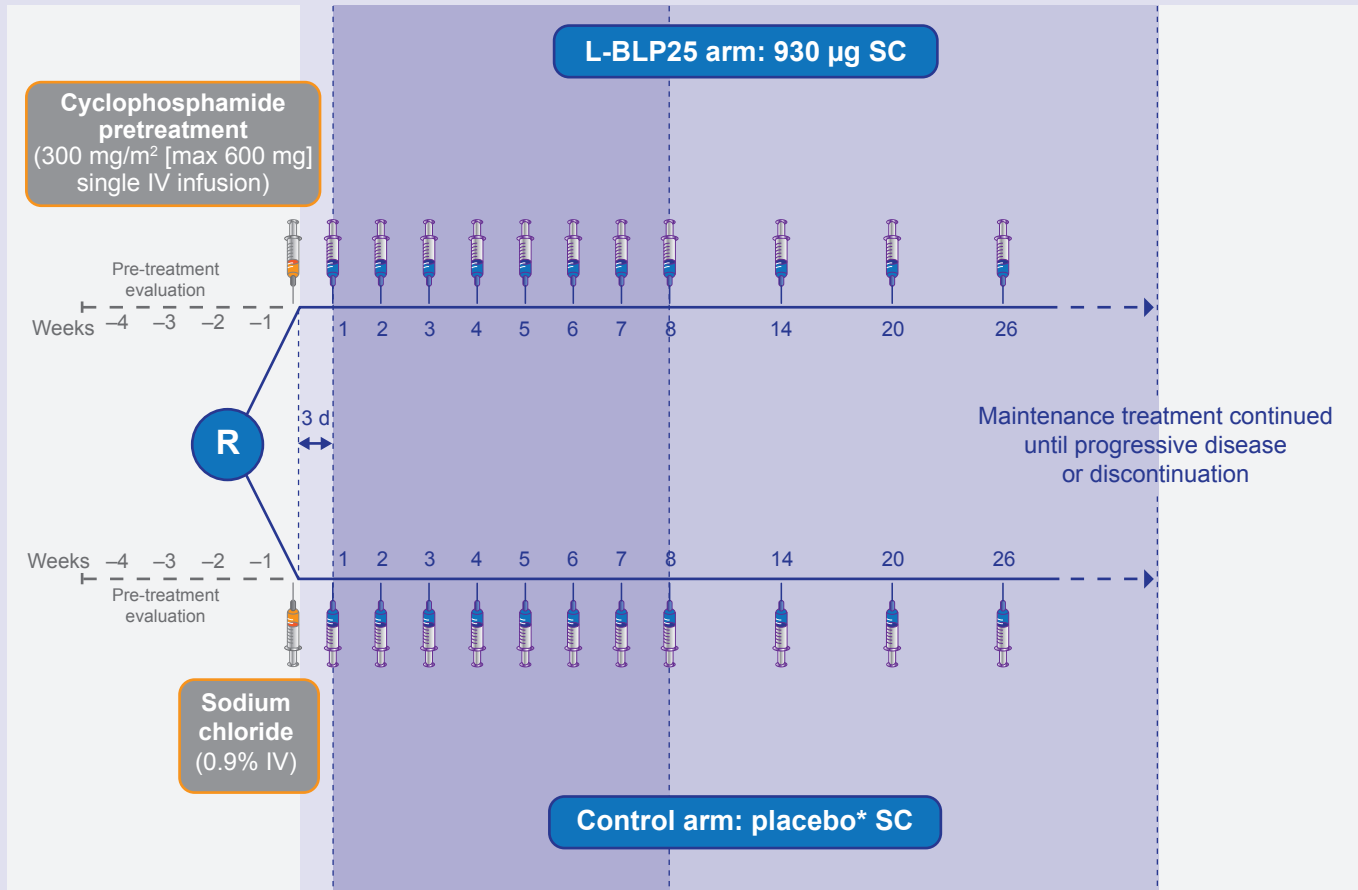

**Cyclophosphamide pretreatment**  
(300 mg/m<sup>2</sup> [max 600 mg] single IV infusion)

**L-BLP25 arm: 930 µg SC**

**Sodium chloride**  
(0.9% IV)

**Control arm: placebo\* SC**

**Tumour imaging\*\***  
(≤28 d prior to randomization)

**Tumour imaging\*\***  
(according to local hospital standards)

\*Formulated to provide the same carrier lipid matrix as L-BLP25, but without the adjuvant (monophosphoryl lipid A) and BLP25 lipopeptide.

\*\*Computed tomography and/or magnetic resonance imaging.

 Each syringe represents four SC injections of L-BLP25 or placebo at four anatomical sites (deltoid or triceps region of the upper arms and the left and right anterolateral aspects of the abdomen).

 The syringe represents a single IV infusion of cyclophosphamide or saline substitute for cyclophosphamide.

d, days; IV, intravenous; R, randomization; SC, subcutaneous.
